# Supplementary material for: Androgen receptor transcriptionally regulates semaphorin 3C in a GATA2-dependent manner
Source: PubMed Central journal article supplement (PMC5354758; doi:10.18632/oncotarget.14168), 2016-12-25
Supplement: oncotarget-08-9617-s001.pdf [file oncotarget-08-9617-s001.pdf]

## Androgen receptor transcriptionally regulates semaphorin 3C in a GATA2-dependent manner

### SUPPLEMENTARY FIGURES

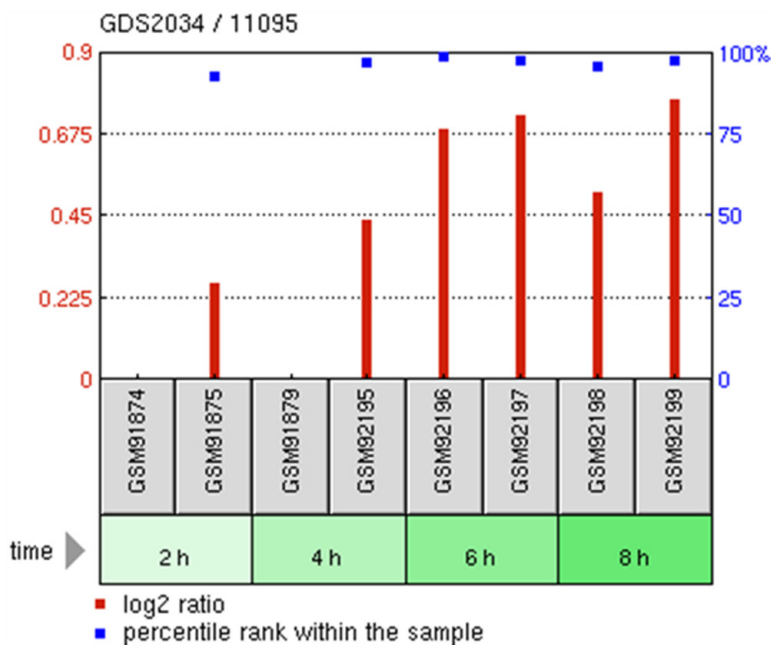

**Supplementary Figure 1: Time-dependent increase in SEMA3C expression in response to R1881 in microarray.** Data mining of GEO accession number GDS2034 show that the levels of SEMA3C mRNA increase over time in LNCaP treated with R1881. To identify targets of the AR, Hendriksen *et al* looked at expression profiles of LNCaP treated with R1881 for up to 8 hours. Samples: GSM91874: LNCaP\_2h\_R1881\_rep1, GSM91875: LNCaP\_2h\_R1881\_rep2, GSM91879: LNCaP\_4h\_R1881\_rep1, GSM92195: LNCaP\_4h\_R1881\_rep2, GSM92196: LNCaP\_6h\_R1881\_rep1, GSM92197: LNCaP\_6h\_R1881\_rep2, GSM92198: LNCaP\_8h\_R1881\_rep1, GSM92199: LNCaP\_8h\_R1881\_rep2.

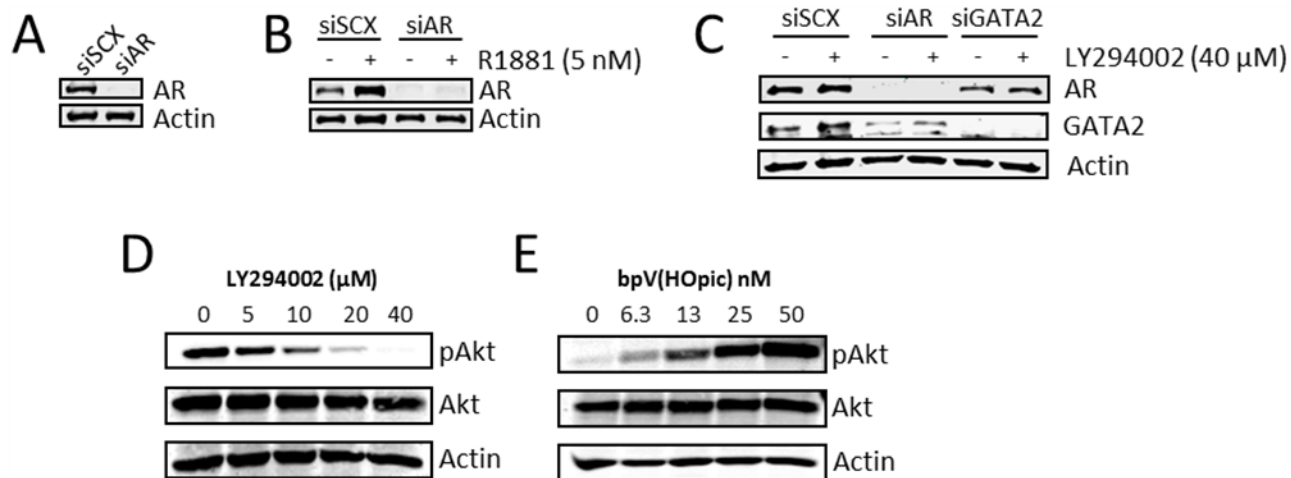

**Supplementary Figure 2: Confirmational Western blots.** A and B. Knockdown of AR for Figure 2I and 2J was confirmed by Western blot. C. Knockdown of AR and GATA2 for Figure 2L was confirmed by Western blot. D and E. Phospho-Akt was used to monitor the effects of LY294002 and bpV(HOpic) on PI3K activity. Total Akt and actin served as loading controls.

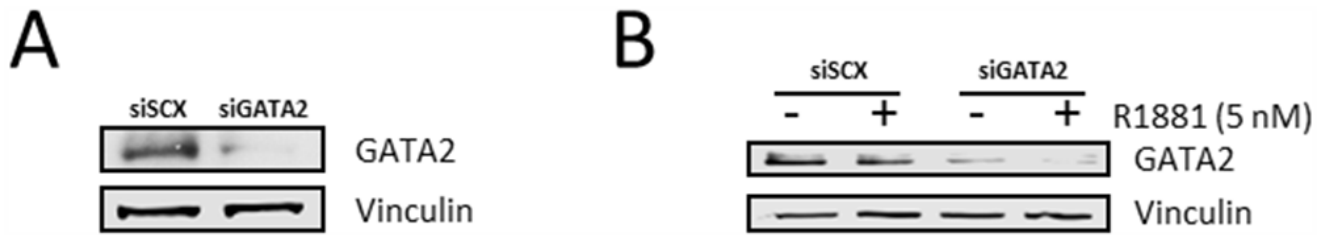

**Supplementary Figure 3: Confirmation of knockdown of GATA2.** **A.** Verification of knockdown of GATA2 for Figure 5A and 5B was confirmed by Western blot where vinculin served as a loading control. **B.** Knockdown of GATA2 for Figure 5E was confirmed by Western blot.

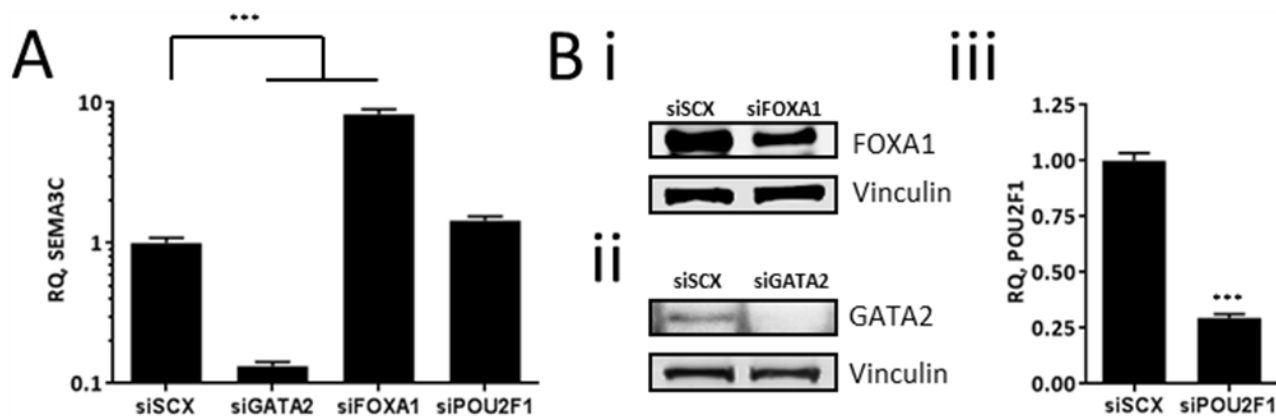

**Supplementary Figure 4: GATA2 positively regulates SEMA3C expression and FOXA1 negatively regulates SEMA3C expression in C4-2 cells.** **A.** C4-2 cells were separately knocked down with each of siGATA2, siFOXA1, and siPOU2F1, to confirm findings seen in LNCaP. Compared to C4-2 cells treated with scrambled siRNA (siSCX), C4-2 cells treated with siGATA2 had significantly diminished SEMA3C expression while C4-2 cells treated with siFOXA1 showed an upregulation of SEMA3C; C4-2 cells treated with siPOU2F1 showed a modest induction of SEMA3C. These results mirror those seen in LNCaP. **B.** Validation of knockdown was shown by Western blot analysis or qPCR. Data represent mean,  $\pm$  SD; \*\*\*  $p < 0.001$ .
